## CORRECTION

# Correction: Time trends in self-reported depressive symptoms, prescription of antidepressants, sedatives and hypnotics and the emergence of social media among Norwegian adolescents

Lars Lien, Tore Bonsaksen, Tonje Holte Stea, Annette Løvheim Kleppang, Anne Mari Steigen, Marja Leonhardt

In [Table 1](#), the numbers under the “Antidepressants” of User per 1000 inhabitants for the years 2015, 2018 and 2021 are interchanged. It should have been 21, 23 and 24 for girls and 9, 11, 10 for boys respectively. Please see the correct [Table 1](#) here.

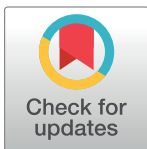

## OPEN ACCESS

**Citation:** Lien L, Bonsaksen T, Stea TH, Kleppang AL, Steigen AM, Leonhardt M (2024) Correction: Time trends in self-reported depressive symptoms, prescription of antidepressants, sedatives and hypnotics and the emergence of social media among Norwegian adolescents. PLoS ONE 19(7): e0306972. <https://doi.org/10.1371/journal.pone.0306972>

**Published:** July 5, 2024

**Copyright:** © 2024 Lien et al. This is an open access article distributed under the terms of the [Creative Commons Attribution License](#), which permits unrestricted use, distribution, and reproduction in any medium, provided the original author and source are credited.

**Table 1. Sample characteristics by year of data collection from the Young in Oslo survey and the Norwegian Prescription Database**

| Year                                          | 1996                              | 2006         | 2012         | 2015          | 2018         | 2021         |
|-----------------------------------------------|-----------------------------------|--------------|--------------|---------------|--------------|--------------|
|                                               | <b>N (%)</b>                      |              |              |               |              |              |
| <b>Gender</b>                                 |                                   |              |              |               |              |              |
| Male                                          | 5680 (51.0%)                      | 5528 (48.8%) | 4801 (49.2%) | 11854(49.3%)  | 6412 (48.8%) | 5065 (49.4%) |
| Female                                        | 5454 (49.0%)                      | 5793 (51.2%) | 4952 (50.8%) | 12182 (50.7%) | 6732 (51.2%) | 5193(50.6%)  |
| <b>Grade</b>                                  |                                   |              |              |               |              |              |
| 9 <sup>th</sup> grade lower secondary school  | 3639 (32.6%)                      | 3687 (32.3%) | 3273 (32.9%) | 8590 (34.2%)  | 4640 (35.2%) | 3648 (34.7%) |
| 10 <sup>th</sup> grade lower secondary school | 3501 (31.3%)                      | 3449 (30.3%) | 3338 (33.6%) | 7764 (30.9%)  | 4205 (31.9%) | 3727 (35.4%) |
| 1 <sup>st</sup> grade upper secondary school  | 4039 (36.1%)                      | 4262 (37.4%) | 3323 (33.5%) | 8790 (35.0%)  | 4348 (33.0%) | 3142 (29.9%) |
| <b>HSCL-6 (Depressive symptoms)</b>           |                                   |              |              |               |              |              |
| Felt that everything is a struggle            |                                   |              |              |               |              |              |
| Low level                                     | 6543 (60.9%)                      | 7030 (64.2%) | 5427 (57.1%) | 6828 (59.1%)  | 7120 (58.7%) | 5419 (57.8%) |
| High level                                    | 4205 (39.1%)                      | 3918 (35.8%) | 4075 (42.9%) | 4730 (40.9%)  | 5007 (41.3%) | 3958 (42.2%) |
| Had sleep problems                            |                                   |              |              |               |              |              |
| Low level                                     | 8431 (78.1%)                      | 8294 (75.6%) | 6172 (64.9%) | 7904 (68.2%)  | 8019 (65.9%) | 6172 (65.4%) |
| High level                                    | 2363 (21.9%)                      | 2677 (24.4%) | 3336 (35.1%) | 3693 (31.8%)  | 4152 (34.1%) | 3267 (34.6%) |
| Felt unhappy, sad or depressed                |                                   |              |              |               |              |              |
| Low level                                     | 8514 (79.0%)                      | 8609 (78.7%) | 7004 (73.8%) | 8637 (74.7%)  | 8585 (70.9%) | 6435 (68.4%) |
| High level                                    | 2262 (21.0%)                      | 2332 (21.3%) | 2486 (26.2%) | 2927 (25.3%)  | 3530 (29.1%) | 2977 (31.6%) |
| Felt hopelessness about the future            |                                   |              |              |               |              |              |
| Low level                                     | 8860 (82.5%)                      | 8503 (78.0%) | 7014 (74.1%) | 8285 (71.7%)  | 8418 (69.6%) | 6386 (68.0%) |
| High level                                    | 1876 (17.5%)                      | 2401 (22.0%) | 2455 (25.9%) | 3273 (28.3%)  | 3685 (30.4%) | 3004 (32.0%) |
| Felt stiff or tense                           |                                   |              |              |               |              |              |
| Low level                                     | 8089 (75.6%)                      | 8196 (75.5%) | 6787 (71.9%) | 8691 (75.5%)  | 8681 (72.1%) | 6499 (69.7%) |
| High level                                    | 2610 (24.4%)                      | 2658 (24.5%) | 2648 (28.1%) | 2820 (24.5%)  | 3355 (27.9%) | 2826 (30.3%) |
| Worried too much about things                 |                                   |              |              |               |              |              |
| Low level                                     | 6916 (64.5%)                      | 6874 (63.0%) | 5406 (57.1%) | 6382 (55.2%)  | 6133 (50.7%) | 4622 (49.3%) |
| High level                                    | 3812 (35.5%)                      | 4036 (37.0%) | 4067 (42.9%) | 5174 (44.8%)  | 5973 (49.3%) | 4755 (50.7%) |
| <b>Loneliness</b>                             |                                   |              | Missing data |               |              |              |
| Low level                                     | 6340 (94.1%)                      | 9288 (90.8%) |              | 8942 (79.5%)  | 9218 (76.2%) | 6919 (73.6%) |
| High level                                    | 401 (5.9%)                        | 936 (9.2%)   |              | 2306 (20.5%)  | 2886 (23.8%) | 2482 (26.4%) |
| <b>Prescribed drugs year</b>                  | <b>2004</b>                       | <b>2006</b>  | <b>2012</b>  | <b>2015</b>   | <b>2018</b>  | <b>2020</b>  |
|                                               | <b>Users per 1000 inhabitants</b> |              |              |               |              |              |
| <b>Antidepressants</b>                        |                                   |              |              |               |              |              |
| Girls                                         | 13                                | 13           | 18           | 21            | 23           | 24           |
| Boys                                          | 7                                 | 7            | 7            | 9             | 11           | 10           |
| <b>Hypnotics and sedatives</b>                |                                   |              |              |               |              |              |
| Girls                                         | 9                                 | 10           | 18           | 22            | 22           | 30           |
| Boys                                          | 7                                 | 8            | 14           | 16            | 16           | 23           |

<https://doi.org/10.1371/journal.pone.0306972.t001>

### Reference

1. Lien L, Bonsaksen T, Holte Stea T, Kleppang AL, Steigen AM, Leonhardt M (2023) Time trends in self-reported depressive symptoms, prescription of antidepressants, sedatives and hypnotics and the emergence of social media among Norwegian adolescents. PLOS ONE 18(12): e0295384. <https://doi.org/10.1371/journal.pone.0295384> PMID: 38150420
